# Supplementary material for: AdipoRon Inhibits Neuroinflammation Induced by Deep Hypothermic Circulatory Arrest Involving the AMPK/NF-κB Pathway in Rats
Source: MDPI journal article supplement (doi:10.3390/pharmaceutics14112467), 2022-11-15
Supplement: s1 [file s1]

---

**AdipoRon Inhibits Neuroinflammation Induced by Deep Hypothermic  
Circulatory Arrest Involving the AMPK/NF- $\kappa$ B Pathway in Rats**

Weidong Yan<sup>1</sup>, Sizhe Gao<sup>1</sup>, Qiaoni Zhang<sup>1</sup>, Jiachen Qi<sup>1, 2</sup>, Gang Liu<sup>1</sup>, Yuan Teng<sup>1</sup>,  
Jian Wang<sup>1</sup>, Shujie Yan<sup>1</sup>, Bingyang Ji<sup>1, \*</sup>

1 Department of Cardiopulmonary Bypass, Fuwai Hospital, National Center for Cardiovascular Disease, State Key Laboratory of Cardiovascular Medicine, Chinese Academy of Medical Science & Peking Union Medical College, Beijing, 100037, China.

2 Department of Pain Medicine, Beijing Tsinghua Changgung Hospital, School of Clinical Medicine, Tsinghua University, Beijing, 102218, China

## Supplemental Figures

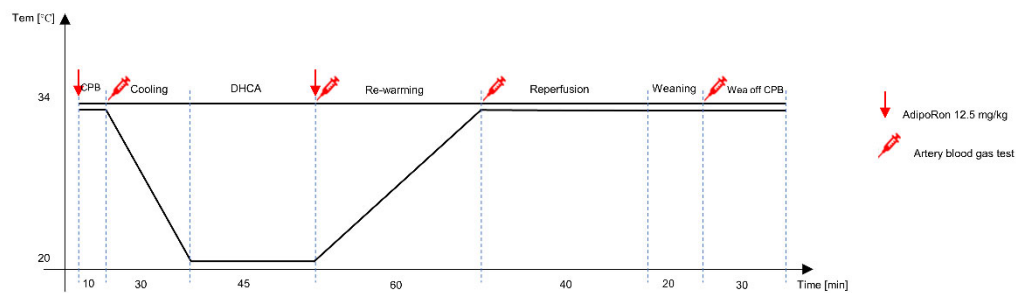

### Supplemental Figure S1: Flow chart of DHCA model in rats.

CPB: cardiopulmonary bypass, DHCA: deep hypothermic circulatory arrest.

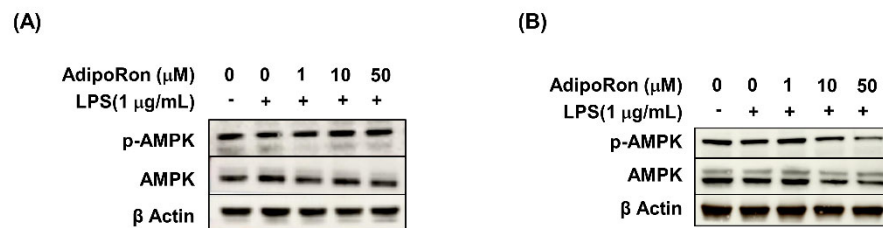

### Supplemental Figure S2: The impact of AdipoRon on the activation of AMPK in BV2 cells.

Expression of phosphorylation status of AMP-activated protein kinase (p-AMPK; molecular weight: 62 kDa), AMPK-activated protein kinase (AMPK; molecular weight: 62 kDa) in BV2 cell were measured by immunoblot. **(A)** BV2 cell were preincubated with AdipoRon (0 – 50  $\mu$ M) or vehicle (dimethyl sulfoxide) for 1 hour before stimulation with lipopolysaccharide (1  $\mu$ g/mL) for 2 hours. **(B)** BV2 cell were preincubated with AdipoRon (0 – 50  $\mu$ M) or vehicle (dimethyl sulfoxide) for 1 hour before stimulation with

---

lipopolysaccharide (1  $\mu\text{g/mL}$ ) for 24 hours. 20  $\mu\text{g}$  protein of each sample was used for gel electrophoresis.

---

**Supplemental Table****Supplemental Table S1. Specific primers for quantitative real-time polymerase chain reaction.**

| Inflammatory factor<br>gene | Sequence                         |
|-----------------------------|----------------------------------|
| Mouse IL-6                  | Forward: TAGTCCTTCCTACCCCAATTTCC |
|                             | Reverse: TTGGTCCTTAGCCACTCCTTC   |
| Mouse IL-1 $\beta$          | Forward: GCAACTGTTCTGAACTCAACT   |
|                             | Reverse: ATCTTTTGGGGTCCGTCAACT   |
| Mouse TNF- $\alpha$         | Forward: CTGAACTTCGGGGTGATCGG    |
|                             | Reverse: GGCTTGTCACTCGAATTTTGAGA |
| Mouse Actin                 | Forward: GGACTCCTATGTGGGTGACG    |
|                             | Reverse: CTTCTCCATGTCGTCCCAGT    |
| Rat IL-6                    | Forward: ACAAGTCCGGAGAGGAGACT    |
|                             | Reverse: GAATTGCCATTGCACAACTCT   |
| Rat IL-1 $\beta$            | Forward: CAGCTTTCGACAGTGAGGAGA   |
|                             | Reverse: TGTCGAGATGCTGCTGTGAG    |
| Rat TNF- $\alpha$           | Forward: GATCGGTCCCAACAAGGAGG    |
|                             | Reverse: CTTGGTGGTTTGCTACGACG    |
| Rat Actin                   | Forward: CCCGCGAGTACAACCTTCTTG   |
|                             | Reverse: TCATCCATGGCGAACTGGTGG   |
